# Supplementary material for: A Latent Pro-Survival Function for the Mir-290-295 Cluster in Mouse Embryonic Stem Cells
Source: PubMed Central journal article supplement (PMC3088722; doi:10.1371/journal.pgen.1002054), 2011-05-05

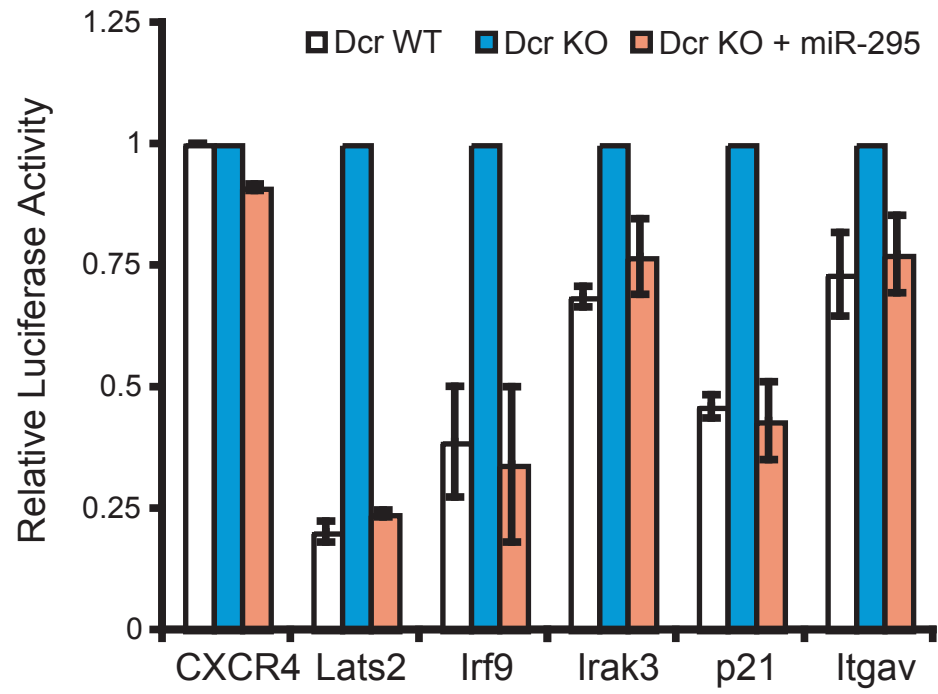

Supplement: pgen.1002054.s002.pdf [file pgen.1002054.s002.pdf]
