# Supplementary material for: A Latent Pro-Survival Function for the Mir-290-295 Cluster in Mouse Embryonic Stem Cells
Source: PubMed Central journal article supplement (PMC3088722; doi:10.1371/journal.pgen.1002054), 2011-05-05
Supplement: pgen.1002054.s008.pdf [file pgen.1002054.s008.pdf]

| Cluster                                | Chr  | miRNA       | Sequence                 | % cloned in different ES cell lines |                        |                       |
|----------------------------------------|------|-------------|--------------------------|-------------------------------------|------------------------|-----------------------|
|                                        |      |             |                          | Leung et. al.<br>(a)                | Babiarz et. al.<br>(b) | Ciaudo et. al.<br>(c) |
| mir-290-295<br>cluster                 | chr7 | miR-290-3p  | AAAGUGCCGCCUAGUUUUAAAGCC | 0.01                                | 6.31                   | 0.03                  |
|                                        |      | miR-291a-3p | AAAGUGCUUCCACUUUGUGUG    | 1.28                                | 8.36                   | 16.71                 |
|                                        |      | miR-291b-3p | AAAGUGCAUCCAUUUUGUUUG    | 0.03                                | 0.88                   | 0.00                  |
|                                        |      | miR-292-3p  | AAAGUGCCGCCAGGUUUUGAGUG  | 2.66                                | 12.47                  | 10.10                 |
|                                        |      | miR-294     | AAAGUGCUUCCUUUUUGUGUG    | 13.56                               | 10.82                  | 12.72                 |
|                                        |      | miR-295     | AAAGUGCUACUACUUUUUGAGUC  | 25.01                               | 13.70                  | 8.89                  |
| <b>Percentage of total miRNA reads</b> |      |             |                          | <b>42.55</b>                        | <b>52.53</b>           | <b>48.44</b>          |

(a) A.K. Leung, A.G. Young, A Bhutkar, G.X. Zheng, A.D. Bosson, C.B. Nielsen, and P.A. Sharp. Nat Struct Mol Biol. 2011. 18 (2).

(b) J.E. Barbiarz, J.G. Ruby, Y. Wang, D.P. Bartel, and R. Blelloch. Genes Dev 2008. 22 (20).

(c) C. Ciaudo et. al., PLoS Genet. 2009. 5 (8).
