# Supplementary material for: A Latent Pro-Survival Function for the Mir-290-295 Cluster in Mouse Embryonic Stem Cells
Source: PubMed Central journal article supplement (PMC3088722; doi:10.1371/journal.pgen.1002054), 2011-05-05
Supplement: pgen.1002054.s010.pdf [file pgen.1002054.s010.pdf]

## Gene symbols of predicted targets

1110018G07Rik  
1110021L09Rik  
1110037F02Rik  
1110067D22Rik  
1190002N15Rik  
1200009F10Rik  
1200015N20Rik  
1300001I01Rik  
1300014I06Rik  
1600029D21Rik  
1700021K19Rik  
1700061G19Rik  
1810013L24Rik  
1810026J23Rik  
2010301N04Rik  
2010305A19Rik  
2210010L05Rik  
2310008H09Rik  
2310035C23Rik  
2310044G17Rik  
2410014A08Rik  
2610020H08Rik  
2700078E11Rik  
2700081O15Rik  
4631416L12Rik  
4632434I11Rik  
4732496O08Rik  
4921505C17Rik  
4930453N24Rik  
4931414P19Rik  
4933434E20Rik  
6030458C11Rik  
6330409N04Rik  
A430093A21Rik  
A830007P12Rik  
AA881470  
Abca1  
Abhd12  
Abi1  
Abl2  
Acaa1a  
Acbd5

Acox1  
Acpp  
Adam17  
Adam23  
Adam9  
Adamts5  
Aebp2  
Agk  
AI450540  
AI747699  
Aifm1  
Akt1  
Alcam  
Aldh1b1  
Alg2  
Alpk3  
Als2cr13  
Amotl1  
Ampd3  
Ank2  
Ankfy1  
Ankib1  
Ankmy2  
Ankrd17  
Ankrd32  
Ankrd44  
Ankrd57  
Aof1  
Ap1g1  
Ap1m1  
Ap3m1  
Apbb2  
Apc  
Apcdd1  
App  
Arfgap3  
Arhgap1  
Arhgap28  
Arhgef12  
Arhgef17  
Arhgef3  
Arhgef5  
Arhgef7

Arid4a  
Arl4a  
Arl6ip5  
Arpp19  
Arzb  
Asb8  
Ash1l  
Asxl2  
Atad2  
Ate1  
Atg16l1  
Atg2a  
Atp11a  
Atp2a2  
Atp6ap2  
Atp7a  
Atrn  
AU040829  
B230219D22Rik  
Bahd1  
Bat5  
Bbx  
BC010304  
BC022623  
BC038286  
BC043118  
BC062127  
Bcor  
Bdh1  
Bicd2  
Blcap  
Blzf1  
Bmi1  
Bmp2k  
Brms1l  
Btaf1  
Btbd10  
Btbd14a  
Btbd7  
Btbd9  
Btg1  
Bub3  
C330002119Rik

C330007P06Rik

C77370

C87436

Cadm1

Calm1

Camk1d

Camk2n1

Camsap1

Camsap1l1

Cand1

Casc4

Casd1

Cask

Casp2

Cast

Cav1

Cbara1

Cbx4

Cc2d1a

Ccdc100

Ccdc102a

Ccdc115

Ccdc128

Ccdc93

Ccnd1

Ccnd2

Ccng1

Ccnj

Cd109

Cd151

Cd24a

Cd2ap

Cd55

Cdc23

Cdc2l6

Cdc42se1

Cdh2

Cdk6

Cdkn1a

Cdo1

Cds1

Cds2

Ceacam1

Cenpq  
Cep170  
Cep55  
Cgnl1  
Chd3  
Chfr  
Chic1  
Chmp4c  
Chn2  
Cic  
Cirbp  
Clcn4-2  
Clic1  
Clock  
Clpb  
Clptm1l  
Cnot6l  
Cobl  
Col4a1  
Col4a2  
Coq10b  
Cpd  
Cpe  
Cpeb1  
Cpeb3  
Cpne5  
Cpt1a  
Crebl1  
Crebl2  
Crem  
Crot  
Crtc2  
Cs  
Csf1  
Csnk1g1  
Cstf2t  
Ctgf  
Ctsb  
Ctxn1  
Cxadr  
Cyld  
Cyp1b1  
D030011O10Rik

D030056L22Rik  
D10Ertd641e  
D12Ertd553e  
D16Ertd472e  
D2Bwg1335e  
D4Wsu53e  
D6Wsu163e  
D6Wsu176e  
D730040F13Rik  
D930001I22Rik  
Daam1  
Dab2  
Daglb  
Dazap2  
Dck  
Dcun1d3  
Dcun1d4  
Ddef1  
Ddef2  
Ddhd1  
Ddx19a  
Ddx3x  
Ddx46  
Ddx5  
Dedd  
Dennd2c  
Derl2  
Dgke  
Dhdh  
Dhx40  
Dixdc1  
Dnajib5  
Dnajib6  
Dnajib9  
Dnase2a  
Dnm1l  
Dock4  
Dock5  
Dock9  
Dsg2  
Dsn1  
Dync1li2  
E030018N11Rik

E330016A19Rik  
E430028B21Rik  
Ect2  
Edem1  
Edn1  
Eea1  
EG435970  
Egfr  
Ehd1  
Ei24  
Eif2ak2  
Eif5b  
Elavl2  
Elf1  
Elk3  
Elk4  
Enpp4  
Entpd4  
Entpd7  
Epas1  
Epc2  
Epha2  
Epha4  
Erb2ip  
Erlin1  
Erlin2  
Ets1  
Etv1  
Exo1  
Exoc1  
Exoc3  
Exoc5  
Exosc4  
F3  
Fadd  
Fars2  
Fbxl3  
Fbxo11  
Fbxo25  
Fbxo39  
Fgd4  
Fgf4  
Fkbp10

Finc  
Fmnl3  
Fndc3b  
Fosl2  
Foxn2  
Foxp4  
Frmd4a  
Fryl  
Fusip1  
Fut11  
Fyco1  
Fyn  
Fzd6  
G3bp2  
Gab1  
Galnt7  
Gcc2  
Gfpt2  
Ggta1  
Gk5  
Gnb1l  
Gnb5  
Gnpnat1  
Golga1  
Golga2  
Gpa33  
Gpc6  
Gpkow  
Gpr107  
Gpr177  
Gpsm1  
Grsf1  
Gtf3c2  
H13  
Hcfc1  
Heatr6  
Hexim1  
Hif1a  
Hif1an  
Hisppd1  
Hmbox1  
Hook3  
Hoxa1



Hoxd8  
Hp1bp3  
Hps5  
Hrbl  
Hs2st1  
Hsd17b11  
Hspa1b  
Ifitm3  
Ift80  
Igf2bp3  
Ikbkb  
Il17rd  
Il6st  
Inhbb  
Inoc1  
Ints3  
Ints6  
Irak2  
Irak3  
Isgf3g  
Itch  
Itfg1  
Itgav  
Jmjd3  
Jmy  
Kbtbd8  
Kctd1  
Kctd10  
Kctd9  
Kif16b  
Kif1b  
Kif3a  
Kif5c  
Kit  
Klhdc5  
Klhl20  
Klhl28  
Klhl7  
Ktelc1  
Lace1  
Lactb2  
Lamc1  
Lamp2

Laptn4a  
Larp4  
Lass6  
Lats1  
Lats2  
Lcorl  
Leprotl1  
Lgals8  
Lifr  
Lima1  
Lmbr1  
Lnx2  
Lox  
Lrig1  
Lrrc15  
Lrrc58  
Lrrc8a  
Lycat  
Lztl1  
Lztr1  
Magi1  
Magi3  
Man1a  
Maoa  
Mapt  
Marcks  
Mastl  
Mat2b  
Mbd2  
Mbnl1  
Mbnl2  
Mcc  
Mdfic  
Mdh2  
Mecp2  
Med28  
Med6  
Mef2a  
Met  
Mex3c  
Mfap3l  
Mfn2  
Midn

Mier3  
Mink1  
Mis12  
Mitf  
Mkrn3  
Mll1  
Mllt11  
Mllt6  
Mmaa  
Mmp11  
Mmp14  
Mmp23  
Mn1  
Mobkl1a  
Mobkl3  
Mreg  
Mrpl51  
Msrb3  
Mtbp  
Mtm1  
Mtmr3  
Mtmr4  
Mtus1  
Mxd1  
Myb  
Mycn  
Mynn  
Myo1c  
Nagk  
Nagpa  
Nanos1  
Napb  
Nbea  
Ncam1  
Ncapg2  
Ncoa3  
Ncoa7  
Ndn  
Ndst1  
Necap1  
Neo1  
Neurod1  
Nfatc2ip

Nfib  
Nfya  
Nhsl1  
Niban  
Nid1  
Nkiras1  
Nnat  
Nope  
Nr2c1  
Nr3c1  
Nrpb1  
Nrp2  
Ntn1  
Nup35  
Oas1g  
Obfc2a  
Orc2l  
Os9  
Ostm1  
Otub1  
Otud4  
Otud6b  
P2rx4  
Pafah1b2  
Pank3  
Papola  
Pbxip1  
Pcsk7  
Pdgfc  
Pdgfd  
Pdik1l  
Pdpk1  
Pdzd2  
Pecam1  
Pex19  
Pfkfb3  
Pfn2  
Phtf2  
Phyhip1  
Pigk  
Pigm  
Pign  
Pik3c2a

Pik3cb  
Pik3r3  
Pja2  
Pkd2  
Pknx1  
Pldn  
Plekha3  
Plekha1  
Plk4  
Plscr3  
Pmp22  
Polr3f  
Ppap2b  
Ppp6c  
Pqlc1  
Prdm4  
Prdx3  
Prkaa1  
Pros1  
Ptpn9  
Ptpng  
Ptpnj  
Ptpnk  
Pvr  
Qser1  
Rab11fip1  
Rab21  
Rab22a  
Rab33b  
Rab5c  
Rab711  
Rabgap1  
Rad21  
Rad23b  
Rasa1  
Rb1cc1  
Rcan1  
Reck  
Reep3  
Rexo2  
Rfxdc2  
Rgnef  
Rhoc

Ripk1  
Rnf128  
Rnf138  
Rnf14  
Rnf146  
Rnf20  
Rock2  
Rpia  
Rragd  
Rreb1  
Rrm2  
Rrm2b  
Rtn1  
Rtn4  
Rtn4rl1  
Sall1  
Sart3  
Sass6  
Sbf1  
Scoc  
Scp2  
Scpep1  
Sdc1  
Sdc2  
Sema3c  
Sema4b  
Semp7  
Seps1  
Serinc1  
Serinc3  
Serpib9b  
Serpine1  
Serpini1  
Sertad2  
Setbp1  
Sgms1  
Sh3gl2  
Shoc2  
Sipa1l3  
Sirt7  
Skp2  
Slain2  
Slc10a7

Slc12a2  
Slc12a7  
Slc16a6  
Slc16a9  
Slc19a2  
Slc25a16  
Slc25a40  
Slc30a1  
Slc35a4  
Slc35a5  
Slc35b4  
Slc39a6  
Slc4a4  
Slc6a15  
Slc6a6  
Slco5a1  
Slu7  
Smad2  
Smad6  
Smarcc2  
Smg7  
Smndc1  
Snap29  
Sntb2  
Snx12  
Snx16  
Snx30  
Socs5  
Sod2  
Sos1  
Sox11  
Sox21  
Sparc  
Spin4  
Spnb2  
Spp1  
Spry4  
Sptlc1  
Spty2d1  
Ssbp2  
Ssfa2  
Ssr1  
Ssx2ip

St3gal5  
St5  
Stamp  
Stard13  
Stat1  
Stk11ip  
Stk3  
Stk38  
Stk38l  
Stk4  
Strn  
Styx  
Sumf1  
Surf4  
Susd2  
Suv39h1  
Suv420h1  
Syap1  
Syncrip  
Synj2  
Taf7  
Taf9b  
Tanc1  
Taok1  
Tapt1  
Tbc1d12  
Tbc1d15  
Tbc1d23  
Tbc1d8b  
Tbc1d9  
Tbcel  
Tbl1xr1  
Tbx3  
Tceb3  
Tcfap4  
Tcfcp2l1  
Tfb2m  
Tfrc  
Tgfr1  
Tgfr2  
Tgoln1  
Thbs1  
Thtpa



Tiam1  
Tinagl  
Tiparp  
Tle4  
Tm9sf3  
Tmco1  
Tmed2  
Tmed4  
Tmem111  
Tmem123  
Tmem127  
Tmem16f  
Tmem184b  
Tmem188  
Tmem33  
Tmem41b  
Tmem43  
Tmem64  
Tmem79  
Tmem87b  
Tmtc3  
Tmub2  
Tnfaip1  
Tnfrsf21  
Tnrc18  
Tnrc6b  
Tnrc6c  
Tob2  
Tom1l2  
Topors  
Tor1b  
Tpk1  
Tpm2  
Tpp1  
Trak1  
Trib1  
Trim25  
Trim35  
Trim36  
Trps1  
Tsga14  
Tspyl2  
Tsr2

Ttc3  
Ttc30b  
Ttc8  
Tubb2b  
Tulp4  
Twf1  
Txnrd3  
Tyw3  
Ube2g1  
Ube2q2  
Ube2w  
Ube2z  
Ube4a  
Ubfd1  
Ubtf  
Ubx4  
Ubx6  
Uchl1  
Unkl  
Usp25  
Usp33  
Usp42  
Usp46  
Usp9x  
Vcl  
Vim  
Vps26a  
Vps4b  
Wars2  
Wdr1  
Wdr40b  
Wdr42a  
Wdr48  
Wee1  
Wisp1  
Yip6  
Ythdf3  
Ywhaz  
Zbtb4  
Zbtb41  
Zcchc2  
Zdhhc20  
Zdhhc9

Zfand2a  
Zfhx3  
Zfp11  
Zfp113  
Zfp148  
Zfp180  
Zfp191  
Zfp213  
Zfp238  
Zfp296  
Zfp319  
Zfp326  
Zfp408  
Zfp422  
Zfp46  
Zfp53  
Zfp553  
Zfp568  
Zfp597  
Zfp650  
Zfp668  
Zfp697  
Zfp704  
Zfp74  
Zfp790  
Zfp800  
Zfp84  
Zfp91  
Zfx  
Zfyve26  
Zmpste24  
Zmym3  
Znfx1  
Zwint
