# Supplementary material for: A Latent Pro-Survival Function for the Mir-290-295 Cluster in Mouse Embryonic Stem Cells
Source: PubMed Central journal article supplement (PMC3088722; doi:10.1371/journal.pgen.1002054), 2011-05-05
Supplement: pgen.1002054.s011.pdf [file pgen.1002054.s011.pdf]

|                          |
|--------------------------|
| <b>siRNA</b>             |
| miR-295                  |
| miR-295<br>seed mutant   |
| miR-290-3p               |
| Control siRNA            |
| si-bim                   |
| si-casp2                 |
| si-ei24                  |
| <b>RT-PCR Primers</b>    |
| Casp2 Forward            |
| Casp2 Reverse            |
| Ei24 Forward             |
| Ei24 Reverse             |
| $\beta$ -actin Forward   |
| $\beta$ -actin Reverse   |
| <b>3'UTR Primers</b>     |
| Irf9 Forward             |
| Irf9 Reverse             |
| Casp2 Forward            |
| Casp2 Reverse            |
| Pax6 Forward             |
| Pax6 Reverse             |
| p21 Forward              |
| p21 Reverse              |
| Thbs1 Forward            |
| Thbs1 Reverse            |
| Itgav Forward            |
| Itgav Reverse            |
| Irak3 Forward            |
| Irak3 Reverse            |
| Lats2 Forward            |
| Lats2 Reverse            |
| <b>Mutagenic Primers</b> |
| Ei24 Site 1              |
| Casp2 Site 1             |
| Casp2 Site 2             |
| Casp2 Site 3             |
| Casp2 Site 4             |
| <b>Northern probes</b>   |
| miR-292 probe            |
| miR-295 LNA              |

**Sequence (5' - 3' unless otherwise noted)**

5'- AAAGUGCUACUACUUUUGAGUCU -3'

3'- UCUUUCACGAUGAUGAAAACUCA -3'

5'- AAAGACGUACUACUUUUGAGUCU -3'

3'- UCUUUCUGCAUGAUGAAAACUCA -3'

5'- AAAGUGCCGCCUAGUUUUAAGCCC -3'

3'- CCUUUCACGGCGGAUCAAAAUUCG -5'

(from Dharmacon, Accell Non-targeting pool)

(from Dharmacon, Smartpool)

(from Dharmacon, Smartpool)

(from Dharmacon, Smartpool)

GCAGGGTCACTTGGAAGACT

GAAGACAGGGAGGACCATCA

TCTCTTCCCATCCATCTT

TAACGTAACGACTCCTTTC

GACGAGGCCAGAGCAAGAGAGG

GGTGTGAAGGTCTCAAACATG

AATAACTCGAGCGCGTCTCCATGGAAATAGA

AATAAGGGCCCTTTAATTTGGAGCTCACATTTCT

AATAACTCGAGCCGCCTGCTATTCCTGCT

AATAAGGGCCCTCAACATTTATTTGGCACCTG

AATAACTCGAGAGAGAGAAGGAGAGAGCATGTG

AATAAGGGCCCAAATCATTCTGAGGATTTCTAGGG

AATAACTCGAGCCTCTTCTGCTGTGGGTCA

AATAAGCGGCCGCAATCATCGAGAAGTATTTATTGAGC

AATAACTCGAGTCATCAGCTGCCAATCATAA

AATAAGGGCCCTTCCATATGATTTATTGTTGTTCTT

AATAACTCGAGCCACTTCTGTCCGCTCCA

AATAAGGGCCCGAAGTCAACTGTAGTGTAATGTGTACC

AATAACTCGAGATCCACCAGAAGATCAAGCAA

AATAAGCGGCCGCTTTTATATAACAATTGGAATGCCACAG

AAACTCGAGCGAGGAAACCCAAAATGAGA

AAAGGGCCCTCCAACAAAACACCACAAATG

GACCAGAGTTTTCCAGCTGTTTTTTTACGTCTTGCCAGCTCCTGT

CCTTACTGTGGCTTCTGCATCGTCTTACACTGTACTTGACGGC

GTACCATATGTGATATAACCTAGAACGTCTTGTCTCTGCTCTTATGAAACTTG

GTGCTTACTGCAGGCTGTAATGCGTCTTTTGCTTGTTCACCTTGTC

CTTACTTACTGATATCCAGTAACTGCGTCTTACTAGGTCTTCATGAATGTTTC

CAAAAGAGCCCCAGTTTGAGT

AGACTCAAAGTAGTAGCACTTT
